# Supplementary material for: METTL14-dependent m6A modification controls iNKT cell development and function
Source: PubMed Central journal article supplement — Cell Rep. Author manuscript; Available in PMC 2022 Sep 22. (PMC9495716; doi:10.1016/j.celrep.2022.111156), 2022-08-02
Supplement: NIHMS1828070-supplement-1.pdf [file NIHMS1828070-supplement-1.pdf]

**Cell Reports, Volume 40**

**Supplemental information**

**METTL14-dependent m<sup>6</sup>A modification controls**

**iNKT cell development and function**

**Liang Cao, Eva Morgun, Samantha Genardi, Lavanya Visvabharathy, Yongyong Cui, Haochu Huang, and Chyung-Ru Wang**

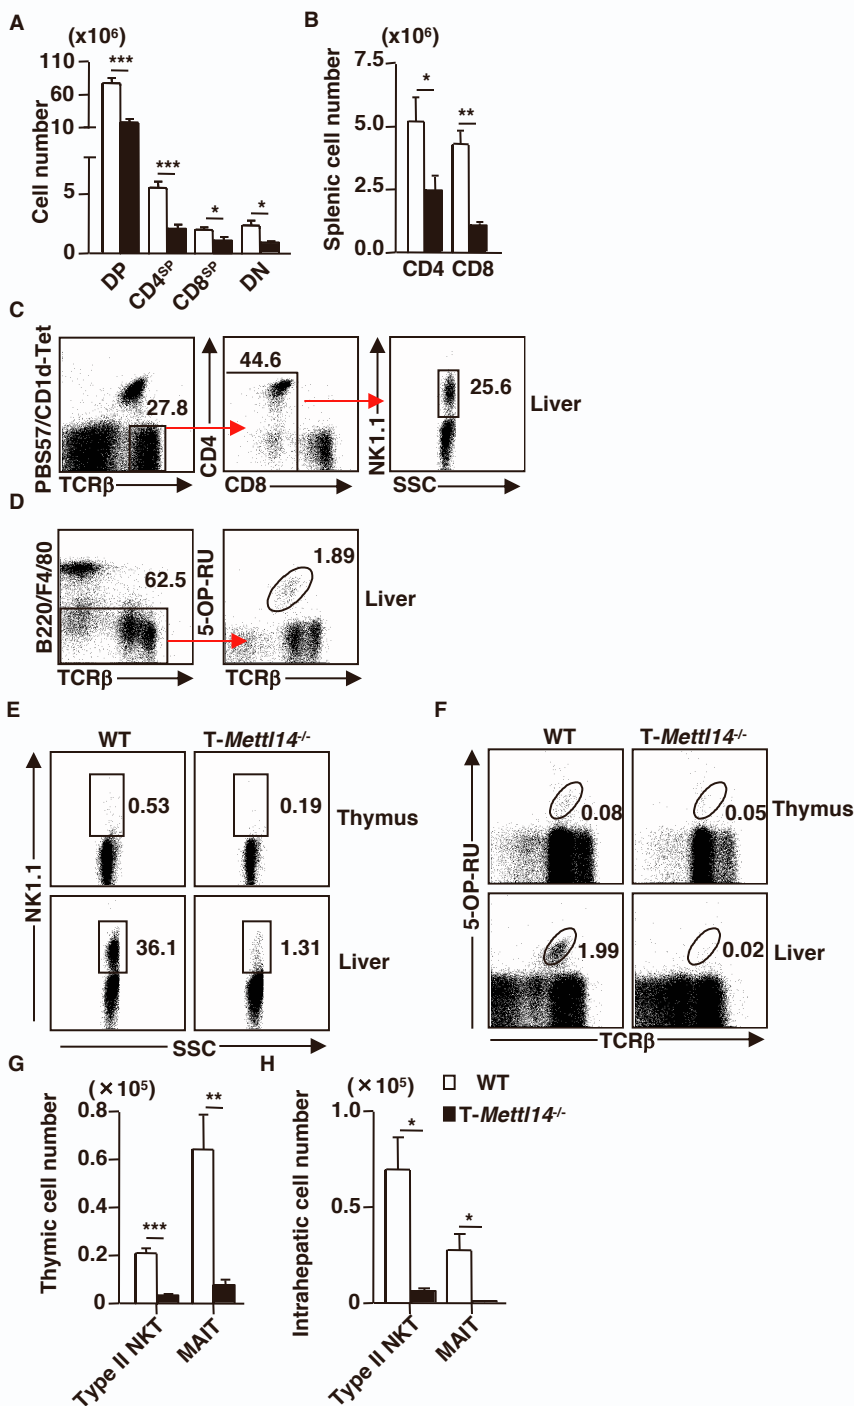

**Figure S1. *Mettl14*-deficiency impaired development of various T cell subsets in the thymus and peripheral. Related to Figure 1. (A)** Cell number of DP, CD4<sup>SP</sup>, CD8<sup>SP</sup> and DN in thymus. **(B)** Cell number of CD4<sup>+</sup> and CD8<sup>+</sup> T cells in spleen. **(C)** Gating strategy of type II NKT cells in the liver of B6 mice. **(D)** Gating strategy of MAIT cells. **(E)** Representative FACS plot of type II NKT cells in thymus and liver. **(F)** Representative plot of MAIT cells in thymus and liver. Cell number of type II NKT cells and MAIT cells in thymus **(G)** and liver **(H)** (n=6-7). SEM is shown. \**P* < 0.05; \*\**P* < 0.01; \*\*\**P* < 0.001.

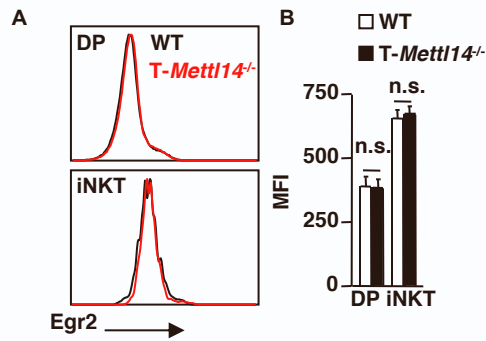

**Figure S2. The expression of Egr2 was not altered in T-*Mettl14*<sup>-/-</sup> mice. Related to Figure 3. (A)** Histogram of Egr2 expression in DP thymocytes and thymic iNKT in T-*Mettl14*<sup>-/-</sup> mice. **(B)** Bar graph of MFI of Egr2 in DP thymocytes and thymic iNKT in T-*Mettl14*<sup>-/-</sup> mice (n=3). SEM is shown. n.s., not significant.

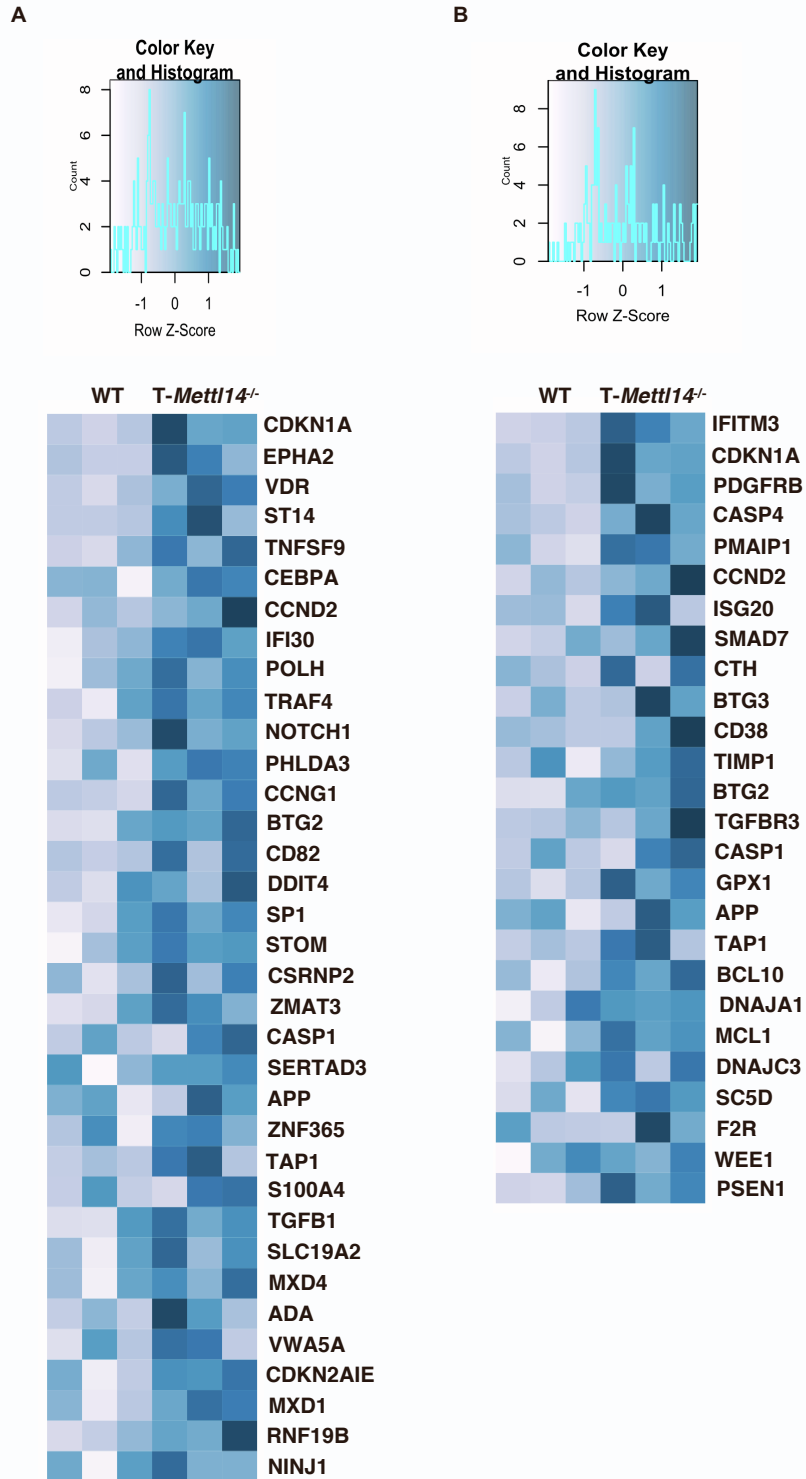

**Figure S3.** Heat map of GSEA core enriched genes. Related to Figure 4. (A) P53 pathway. (B) Apoptosis pathway.

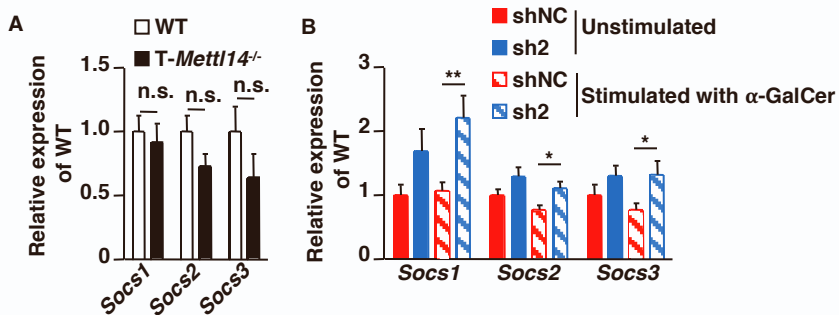

**Figure S4. Expression of *Socs* family genes in T-*Mettl14*<sup>-/-</sup> DP thymocytes and *Mettl14*<sup>KD</sup> DN32.D3 NKT cell hybridomas. Related to Figure 6 and 7.**

(A) The expression of *Socs1*, *Socs2* and *Socs3* was not altered in T-*Mettl14*<sup>-/-</sup> DP thymocytes. (n=6) (B) Increased expression of *Socs1*, *Socs2* and *Socs3* in *Mettl14*<sup>KD</sup> DN32.D3 (n=5-6). SEM is shown. \**P* < 0.05; \*\**P* < 0.01.

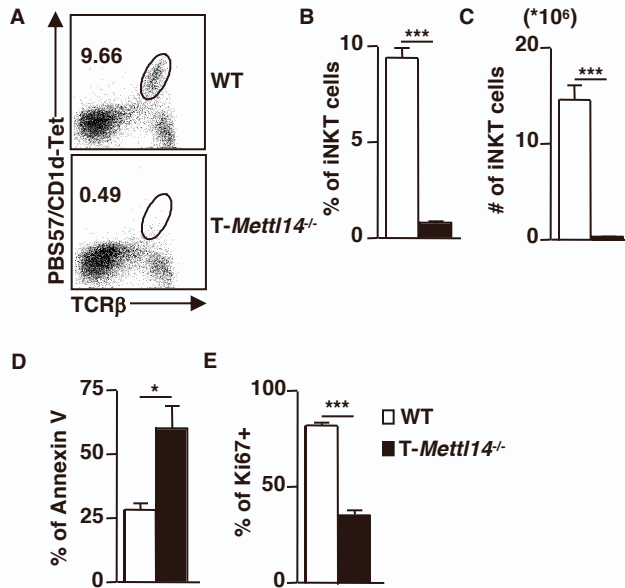

**Figure S5. Expansion of splenic iNKT cells was impaired in T-Mettl14<sup>-/-</sup> mice after *in vivo*  $\alpha$ -GalCer injection. Related to Figure 7. (A) Representative dot plots of splenic iNKT cells in WT and T-Mettl14<sup>-/-</sup> mice at D3 after injection with  $\alpha$ -GalCer (IV). (B and C) Quantification of percentage and absolute cell number of splenic iNKT cells in WT and T-Mettl14<sup>-/-</sup> mice. (D) Percentage of Annexin V<sup>+</sup> in splenic iNKT cells in WT and T-Mettl14<sup>-/-</sup> mice. (E) Percentage of Ki67<sup>+</sup> in splenic iNKT cells. (n=4). SEM is shown. \**P* < 0.05; \*\*\**P* < 0.001.**

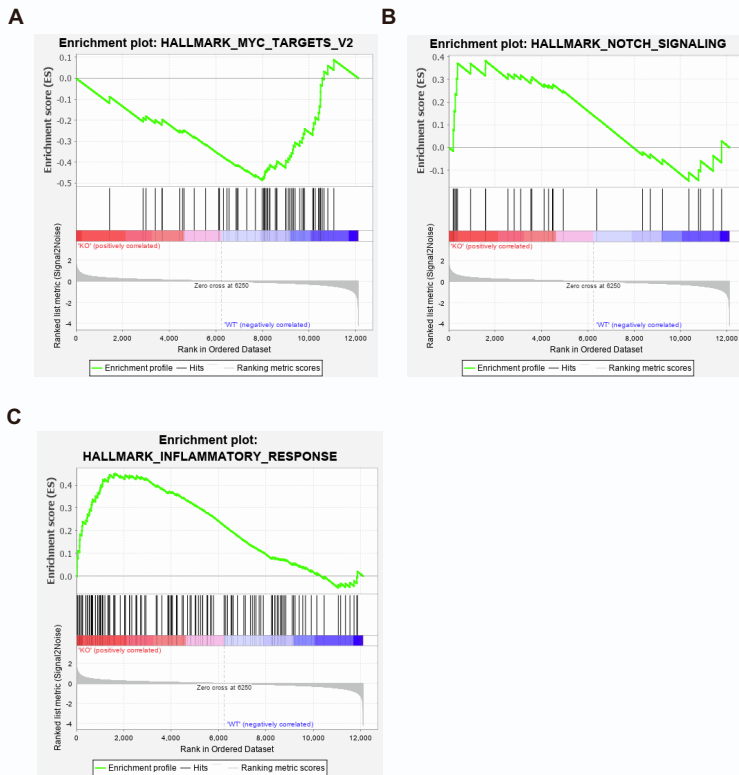

**Figure S6. GSEA analysis of RNaseq data from WT and *T-Mettl14*<sup>-/-</sup> DP thymocytes. Related to Figure 4. (A) Myc signaling pathway. (B) Notch signaling pathway. (C) Inflammation response.**
